# Supplementary material
Source: HighWire-hosted journal article supplement (https://www.ajnr.org/highwire/filestream/52215/field_highwire_adjunct_files/0/1548_table.pdf)
Supplement: 1548_table.pdf [file 1548_table.pdf]

**On-line Table 1: Patient demographics**

| Age (yr) | Sex | Treated Level | Pathology                | Anatomy of Metastatic Lesion                                     | Other Procedures Performed  | Follow-Up VPS | Preprocedure CT Lesion Location           |                                                     | Postprocedure CT                                              |                          |
|----------|-----|---------------|--------------------------|------------------------------------------------------------------|-----------------------------|---------------|-------------------------------------------|-----------------------------------------------------|---------------------------------------------------------------|--------------------------|
|          |     |               |                          |                                                                  |                             |               | Preprocedure CT Lesion Location           | Cement Location                                     | Leakage                                                       | Cement Distribution      |
| 75       | F   | L2            | Plasmacytoma breast, SLE | Post cortical defect                                             | VP T6, T8, T9, T10 (benign) | 9/10 to 2/10  | Ant 2/3 body                              | In lesion                                           | Minimal venous                                                | 80% ant 2/3              |
| 71       | M   | L1            | Lung                     | Epidural extension, post cortical defect                         |                             | 9/10 to 3/10  | Post 2/3 of body                          | Ant to lesion, in lesion                            | Minimal disk                                                  | 80% ant 2/3              |
| 56       | M   | L1            | Renal                    | Paravertebral extension, lat cortical disruption                 | Arterial embolization       | 8/10 to 2/10  | Lesion ant, 2/3 on 1 side (left)          | In lesion                                           | Minimal cortical                                              | 90% ant 2/3              |
| 82       | M   | L5            | Lung                     | Post cortical defect, epidural extension, right neural foramen   |                             | 9/10 to 5/10  | Post 4/5 of body                          | Periphery of lesion                                 | Minimal venous                                                | 60% ant 2/3              |
| 52       | F   | T9            | Breast                   | Ant cortical defect                                              | VP T5, T7, T10              | 8/10 to 5/10  | Lesion anterior                           | Around lesion                                       | Minimal venous                                                | 50% ant 2/3              |
| 70       | M   | L2            | Colon                    | Post cortical defect                                             |                             | 9/10 to 5/10  | Multiple focal lesions of all vertebrae   | In lesions                                          | No leakage                                                    | 75% ant 2/3              |
| 34       | F   | T12           | Myeloma                  | Post cortical defect, epidural extension                         | T7, T8, T11 KP              | No change     | Multiple focal lesions of all vertebrae   | In lesions                                          | No leakage                                                    | 75% ant 2/3              |
| 36       | F   | L2            | Cervix                   | Ant, post cortical defect, parasagittal mass left L2-3 NR        | Left L2-3 NRB               | 9/10 to 9/10  | Left ant 1/2 of body                      | In lesion                                           | Minimal cortical                                              | 75% ant 2/3              |
| 58       | F   | T12           | Breast                   | Post cortical disruption, epidural extension                     | KP T7, T8, T11, L2 VP L3    | 9/10 to 5/10  | Lesions in entire body                    | Ant body                                            | Minimal diskal                                                | 80% ant 2/3              |
| 80       | F   | L4            | Stomach, breast          | Epidural extension, absence of posterior cortex                  |                             | 7/10 to 3/10  | Post body                                 | Ant to lesion                                       | Minimal venous                                                | 100% ant 2/3             |
| 76       | M   | L1            | Liver                    | Post cortical disruption                                         | L3 KP                       | 10/10 to 5/10 | Post body                                 | Ant to lesion                                       | Minimal venous                                                | 70 % ant 2/3             |
| 66       | F   | L3            | Lung                     | Post cortical defect, epidural extension, right neural foramen   | Right NRB                   | 9/10 to 1/10  | Whole left side of body                   | In lesion                                           | Minimal venous, minimal disk RNF                              | 60% ant 2/3              |
| 68       | M   | L5            | Urethral                 | Epidural extension, post cortical defect, right neural foramen   | S1 sacroplasty, RNRB        | 9/10 to 7/10  | Most of right side of body, right pedicle | In periphery of lesion extending into right pedicle | No leakage                                                    | 70% ant 2/3              |
| 72       | M   | L1            | Myeloma                  | Epidural extension                                               | L2 VP                       | 6/10 to 2/10  | Post lesion                               | In lesion                                           | Minimal disk                                                  | 50% middle 1/3           |
| 43       | F   | L3            | Breast                   | No ant cortex                                                    | Sacroplasty, VP L2          | 9/10 to 2/10  | Lesion anterior                           | In lesion                                           | Mild cortical                                                 | 80% of cement ant 2/3    |
| 88       | M   | T12           | Prostate                 | Lat cortical defect                                              | L1 KP                       | 10/10 to 7/10 | Lesion posterior                          | Ant to lesion                                       | No leakage                                                    | 100% ant 2/3             |
| 85       | F   | T11           | Colon                    | Defect ant and lat border                                        | VP/KP L2, L3, L4, T12       | 8/10 to 0/10  | Lesion anterior                           | In lesion                                           | Minimal disk                                                  | 90% ant 2/3              |
| 79       | M   | L1            | Lung                     | No posterior wall                                                |                             | Not available | Lesion is posterior                       | Ant to lesion                                       | Minimal venous                                                | 90% ant 2/3              |
| 76       | F   | L3            | Plasmacytoma             | No post cortex, epidural extension                               |                             | No available  | Lesion in all vertebrae                   | Cement ant                                          | No leakage                                                    | 90 % ant 2/3             |
| 89       | M   | T12           | Lung                     | Epidural extension                                               | KP L1                       | No available  | Lesion all vertebrae                      | Cement ant                                          | Minimal cortical                                              | 100% ant 2/3             |
| 55       | F   | T10           | Plasmacytoma             | Epidural extension, no posterior cortex, extension into pedicles |                             | 9/10 to 4/10  | Lesion all vertebrae                      | Ant body                                            | Mild ant body leakage, cement in left pedicle in needle tract | 70% ant 2/3              |
| 71       | F   | L4            | Urethral                 | Post cortical disruption, epidural extension                     | Sacroplasty                 | Not available | Lesion ant                                | Cement in lesion                                    | Minimal cortical                                              | 90% ant 2/3              |
| 87       | M   | L3, L4        | Urothelial               | Disrupted post cortex, disrupted ant cortex                      |                             | 5/10 to 5/10  | Lesion post L4, lesions in entire body    | Cement ant, cement in lesion                        | Small epidural, minimal cortical                              | 85% ant 2/3, 80% ant 2/3 |
| 82       | F   | T12           | Breast                   | Epidural extension, cortical disruption                          |                             | 8/10 to 7/10  | Lat side of body, lesions in entire body  | In lesion                                           | Minimal venous                                                | 75% ant 2/3              |
| 78       | F   | T6            | Plasmacytoma             | Epidural extension, no post cortex                               |                             | Not available | Post body                                 | Cement in lesion                                    | Small cortical, small epidural                                | 75% ant 2/3              |
| 39       | M   | T11           | Lymphoma                 | No post cortex                                                   |                             | Not available | Ant body                                  | Ant to lesion                                       | Minimal venous                                                | 90% ant 2/3              |
| 83       | M   | L2            | Lymphoma                 | Ant cortical disruption, epidural extension                      | Sacroplasty, L1 KP          | 8/10 to 5/10  | Post part of body                         | In lesion                                           | Minimal venous                                                | 95% ant 2/3              |
| 68       | F   | T7            | Breast                   | No lat cortex, parasagittal soft tissue                          |                             | 8/10 to 5/10  | Mid part of body                          | Ant to lesion                                       | Minimal venous                                                | 100% ant 2/3             |
| 75       | F   | T12           | Breast                   | Epidural extension, ant wall disruption                          | T11, L2 KP                  |               | Whole body                                | In lesion                                           | Minimal cortical                                              | 40% ant column           |
| 83       | F   | T10           | Myeloma                  | Epidural extension                                               |                             | 5/10 to 3/10  | Whole body                                | In lesion, around it                                | No leakage                                                    | 65% ant column           |
| 64       | M   | L1            | Myeloma                  | Lat wall defect                                                  |                             |               | Whole body                                | In lesions                                          | Minimal venous                                                | 75% ant column           |
| 80       | F   | L1            | Myeloma                  | Inf and lat, cortical disruption                                 |                             |               | Whole body                                | In lesion                                           | No leakage                                                    | 80% ant column           |
| 80       | F   | L3            | Renal cell               | Epidural extension, no post cortex                               | L2 VP                       |               | Post body                                 | Ant to lesion                                       | Minimal venous                                                | 75% ant column           |
| 74       | F   | L1            | Breast                   | Lateral cortex disruption; soft-tissue mass                      | T10, L4 VP                  | 4/10 to 1/10  | Ant part                                  | In lesion                                           | Minimal venous                                                | 100% ant column          |
| 59       | F   | L4            | Myeloma                  | Absent post cortex                                               | L5 VP                       | No change     | Post part of body                         | In lesion, anterior                                 | Minimal venous                                                | 90% ant                  |
| 59       | F   | T9            | Breast, colon            | Absent post cortex                                               | L4 VP                       | 8/10 to 9/10  | Post part of body                         | Ant to lesion                                       | Minimal venous                                                | 100% ant                 |
| 84       | M   | T6            | Myeloma                  | Epidural, no post cortex                                         |                             |               | Post part of body                         | Ant to lesion                                       | No leakage                                                    | 90%                      |
| 80       | M   | T8            | Lung                     | No post cortex                                                   | T7, T8 VP                   | 7/10 to 3/10  | Ant body                                  | In lesion                                           | No leakage                                                    | 95%                      |
|          |     |               |                          | Ant cortical destruction                                         |                             |               | Ant body                                  | In lesion                                           | No leakage                                                    | 95%                      |
|          |     |               |                          | Ant wall destruction                                             |                             |               | Ant body                                  | In lesion                                           | No leakage                                                    | 100% ant                 |
|          |     |               |                          | Ant lat cortical destruction                                     |                             |               | Lesion involves whole body                | In lesion                                           | No leakage                                                    | 100% ant                 |

**Note:**—SLE indicates systemic lupus; NR, nerve root; VP, vertebroplasty; KP, kyphoplasty; ant, anterior; post, posterior; NRB, nerve root block; RNRB, right NRB; inf, inferior; lat, lateral.
